# Supplementary material for: Quantitative on-chip determination of taurine in energy and sports drinks
Source: Royal Society of Chemistry journal article supplement (doi:10.1039/b609739a), 2006-11-24
Supplement: b609739a.pdf [file b609739a.pdf]

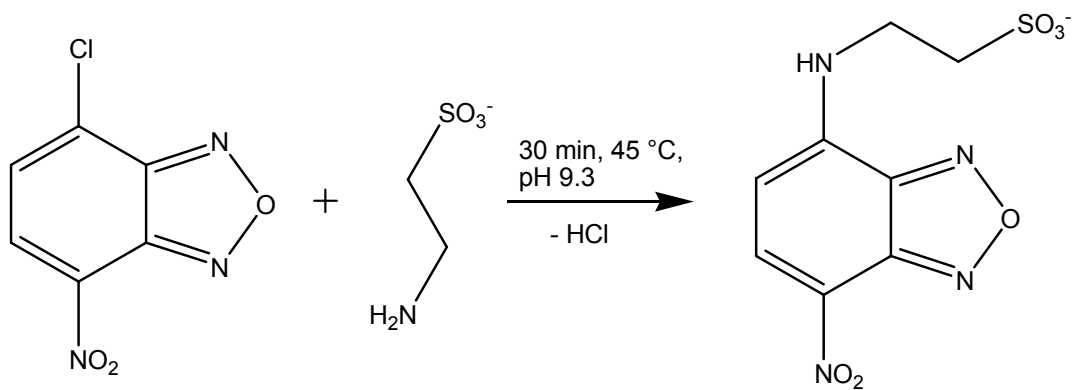

Figure S1: Derivatization of taurine with NBD-Cl under basic conditions.

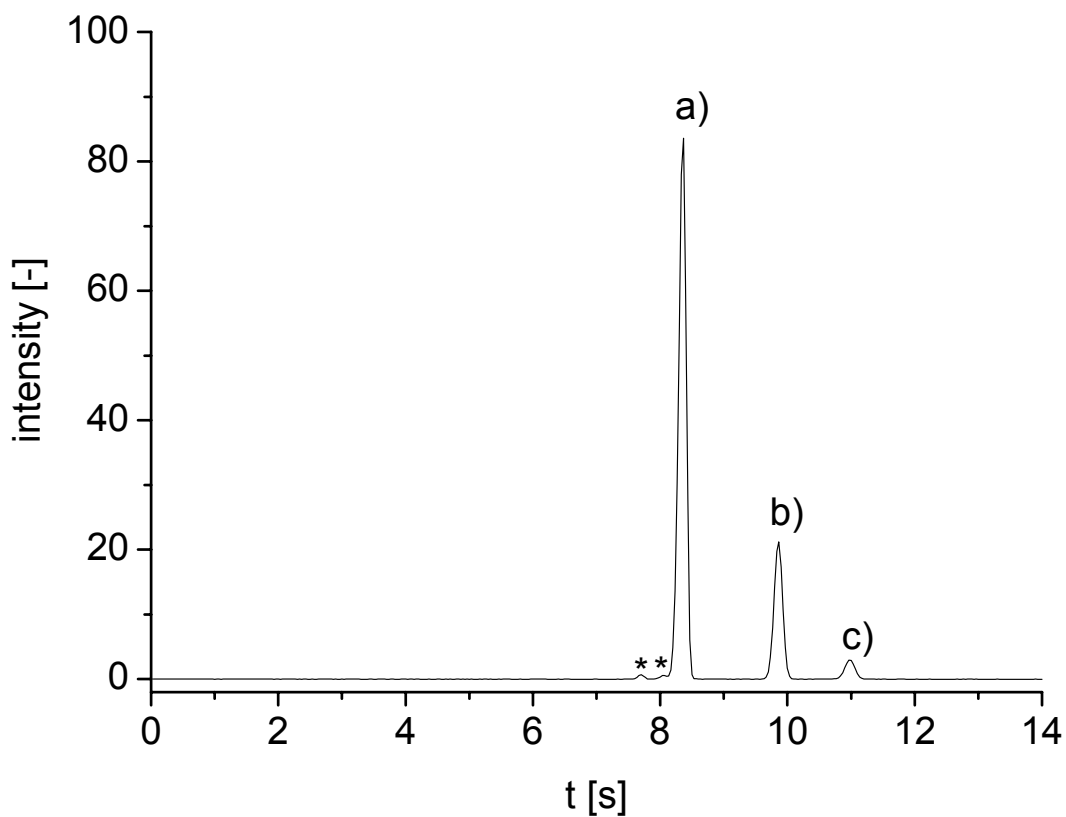

Figure S2: Electropherogram of taurine standard solution (10 mM); a) internal standard, b) taurine derivative, c) hydrolysis product; \* mark unidentified peaks.
